1

2 **Instructor-learner neural synchronization during elaborated feedback predicts**  
3 **learning transfer**

4

5 Yi Zhu<sup>1,2</sup>, Victoria Leong<sup>3,4</sup>, Yingying Hou<sup>1,2</sup>, Dingning Zhang<sup>1,2</sup>, Yafeng Pan<sup>1,5,6\*</sup> and  
6 Yi Hu<sup>1,2\*</sup>

7

8 <sup>1.</sup> *School of Psychology and Cognitive Science, East China Normal University,*  
9 *Shanghai, China*

10 <sup>2.</sup> *Shanghai Key Laboratory of Mental Health and Crisis Intervention, East China*  
11 *Normal University, Shanghai, China*

12 <sup>3.</sup> *Division of Psychology, Nanyang Technological University, Singapore, Republic of*  
13 *Singapore*

14 <sup>4.</sup> *Department of Psychology, University of Cambridge, Cambridge CB2 3EB, United*  
15 *Kingdom*

16 <sup>5.</sup> *Department of Clinical Neuroscience, Karolinska Institutet, Stockholm, Sweden*

17 <sup>6.</sup> *Neuropsychology and Functional Neuroimaging Research Unit, ULB Neuroscience*  
18 *Institute, Université Libre de Bruxelles, Bruxelles, Belgium*

19

20

21 **Author Note**

22 Data collection and preliminary analysis were sponsored by the National Natural  
23 Science Foundation of China (31872783 and 71942001). We have no conflicts of  
24 interest to disclose.

25 Correspondence concerning this article should be addressed to Yi Hu or Yafeng Pan. Yi  
26 Hu, School of Psychology and Cognitive Science, East China Normal University,  
27 Shanghai, China, Email: [yhu@psy.ecnu.edu.cn](mailto:yhu@psy.ecnu.edu.cn); Yafeng Pan, Department of Clinical  
28 Neuroscience, Karolinska Institutet, Stockholm, Sweden, Email:  
29 [yfpan.ecnu@gmail.com](mailto:yfpan.ecnu@gmail.com).

30

31

## Abstract

32 The provision of feedback with complex information beyond the correct answer, i.e.,  
33 elaborated feedback, can powerfully shape learning outcomes such as transfer, i.e., the  
34 ability to extend what has been learned in one context to new contexts. However, an  
35 understanding of neurocognitive processes of elaborated feedback during instructor-  
36 learner interactions remains elusive. Here, a two-person interactive design is used  
37 during simultaneous recording of functional near-infrared spectroscopy (fNIRS) signals  
38 from adult instructor-learner dyads. Instructors either provided elaborated feedback (i.e.,  
39 correct answer and an example) or simple feedback (i.e., correct answer only) to  
40 learners during a concept learning task. Our results showed that elaborated feedback  
41 produced comparable levels of retention to simple feedback, however, transfer was  
42 significantly enhanced by elaboration. We also noted significant instructor-learner  
43 neural synchronization in frontoparietal regions during the provision of elaborated  
44 feedback, especially when examples were provided. Further, interpersonal neural  
45 synchronization in the parietal cortex successfully predicted transfer of knowledge to  
46 novel contexts. This prediction was retained for both learner-delayed and learner-  
47 preceding neural synchronization. These findings point toward transfer effects of  
48 elaborated feedback provided in a social context can be predictable through  
49 interpersonal neural synchronization, which may hold important implications for real-  
50 world learning and pedagogical efficacy.

51 *Keywords:* elaborated feedback, transfer, instruction and learning, interpersonal  
52 neural synchronization, fNIRS hyperscanning

53

---

### **Educational Impact and Implications Statement**

54 Feedback provides learners with crucial information regarding the gap between what  
55 has currently been achieved and what remains to be achieved, and thus plays a critical  
56 role in any learning process. In real-world settings, feedback is typically provided and  
57 received through social interaction, and high-quality “elaborated feedback” contains  
58 complex information that goes beyond the correct answer. This study aims to elucidate  
59 the neurocognitive processes underpinning elaborated feedback during instructor-  
60 learner interactions. We detected significant instructor-learner neural synchronization  
61 in mutual frontoparietal brain regions during elaborated feedback, particularly during  
62 the provision of specific elaborated information (i.e., concrete examples). Moreover,  
63 this synchronization (including learner-delayed and learner-preceded synchronization)  
64 in the parietal region predicted whether the learners transferred learning to novel  
65 examples of learned psychology concepts. This study advances current understanding  
66 on the neural mechanisms for elaborated feedback and the role of social interaction in  
67 feedback effects. These results may have important implications for successful real-  
68 world learning and communication, and related pedagogical applications in educational  
69 settings.

70

71 **Instructor-learner neural synchronization during elaborated**

72 **feedback predicts learning transfer**

73 **Introduction**

74 *Learning through social interaction. As we navigate the world, knowledge and*  
75 *skills are often learned on the basis of communication with others during social*  
76 *interaction.* The recent decade has witnessed a paradigm shift toward the concurrent  
77 measurement of multiple individuals engaging in social interaction (Dai et al., 2018;  
78 Kingsbury & Hong, 2020; Redcay and Schilbach, 2019; Schilbach et al., 2013;  
79 Wheatley et al., 2019), including infant-adult dyads (Leong et al, 2017; Piazza et al.,  
80 2020; Santamaria et al, 2020; Wass et al, 2020) and individuals with neuropsychiatric  
81 disorders (Bilek et al, 2017; Leong & Schilbach, 2019). Relevant research has indicated  
82 that interpersonal neural synchronization (INS) might underlie social interaction and  
83 underpin successful communication (for reviews, see Hasson et al., 2012; Redcay &  
84 Schilbach, 2019). For example, Stephens et al. (2010) demonstrated that when  
85 communication was successful, the information provider's brain activity was  
86 spatiotemporally coupled with the information receiver's; INS also showed provider-  
87 or receiver-preceding patterns, indicating the provider's dominance and the receiver's  
88 prediction, respectively.

89 *Elaborated feedback as a powerful driver in learning. In communication and*  
90 *learning, feedback is a powerful driver of behavioural change as it provides the*  
91 information regarding the gap between what is achieved and what is aimed to be  
92 achieved (Hattie & Timperly, 2007; Mory, 2004). Prior research has identified feedback  
93 as a significant factor in student achievement, and learning motivation (e.g., Lepper &  
94 Chabay, 1985; Narciss & Huth, 2004). Although it is of great significance, feedback has  
95 been regarded as one of the least understood features in the instructional design (Cohen,

1985; Gagne, 1970). In real-world settings, feedback is oftentimes provided and received during two-person interactions, and contains complex information beyond correct answer such as illustrative examples (Hattie & Timperly, 2007). Any type of feedback supplying more complex information than correct answer is generally considered as elaborated feedback (Kulhavy & Stock, 1989). Elaborated feedback has been found to deepen the understanding and promote the transfer to novel contexts (Bangert-Drowns et al., 1991; Butler et al., 2013; Finn et al., 2018; Kulhavy & Stock, 1989, Bransford et al., 1999). However, a scientific understanding of the how elaborated feedback takes effects on learning during social interaction, remains largely elusive.

*Single brain correlates of feedback.* Using single-subject experimental designs, a number of studies have established that frontoparietal brain regions including the anterior cingulate cortex (ACC), the dorsolateral prefrontal cortex (DLPFC), and parietal lobules were implicated in the process of feedback messages such as yes-no verification and correct answer, which is regarded as simple feedback (Cavanagh et al., 2011; Crone et al., 2008; Mars et al., 2005; van Duijvenvoorde et al., 2008; Zanolie et al., 2008). Specifically, the ACC was responsible for basic functions such as error detection and expectation violation (Cavanagh et al., 2011; Luft et al., 2013; Mars et al., 2005), while the DLPFC and the superior parietal lobule was engaged in more complex processes such as error correction and performance adjustment (Crone et al., 2008; van Duijvenvoorde et al., 2008; Zanolie et al., 2008). Brain activation in these regions was related to feedback-based learning outcomes such as the memorization of paired-associates (Arbel et al., 2013), response inhibition (McCormick and Telzer, 2018) and performance on reading and mathematics (Peters et al., 2017). To understand more about neurocognitive processes of elaborated feedback during social interaction, the simultaneous investigation of brain signals from interactive dyads is essential but

121 lacking.

122 *The role of INS in elaborated feedback effects.* Within the general domain of social  
123 interaction and communication, INS has been found to hold specific implications of  
124 effective learning and instruction (Bevilacqua et al., 2018; Dikker et al., 2017; Holper  
125 et al., 2013; Meshulam et al., 2021; Nguyen et al., 2020; Pan et al., 2018; 2020; Piazza  
126 et al., 2021; Zheng et al., 2018). Based on the simultaneous recording of functional  
127 near-infrared spectroscopy (fNIRS) signals from multiple individuals during learning  
128 and instruction without the strict restraint of movement (Boas et al., 2014; Pinti et al.,  
129 2018), research has identified INS associated with learning outcomes. For instance, INS  
130 in the frontal cortex during educational interactions served as a correlate of learners'  
131 performance on singing (Pan et al., 2018) and on statistics (Liu et al., 2019). Besides,  
132 instructor-preceding neural synchronization in temporoparietal areas predicted the  
133 learners' performance on numerical reasoning (Zheng et al., 2018). Once feedback is  
134 combined with more complex information beyond the correctness, it becomes  
135 intertwined with instruction (Hattie & Timperley, 2007). Thence, synchronized brain  
136 activity in instructor-learner dyads may offer a new lens into how elaborated feedback  
137 takes effects on learning in naturalistic educational settings.

138 *The present study.* Here, we applied fNIRS to simultaneously record brain signals  
139 from adult instructors and learners during an ecologically valid yet experimentally  
140 controlled educational interaction. Learners studied psychology concepts and received  
141 elaborated feedback or simple feedback from instructors. Elaborated feedback  
142 contained the correct answer and an example, illustrating the concepts in concrete and  
143 real-world situations, while simple feedback only contained the correct answer. Post-  
144 learning, learners were assessed for [whether they recognized the definitions of learned](#)  
145 [psychology concepts \(i.e., retention measure\) and whether they transferred learning to](#)

146 identify novel examples of learned psychology concepts (i.e., transfer measure). We  
147 hypothesized that elaborated feedback enhanced learning performance, especially on  
148 the transfer measure, relative to simple feedback. Providing and receiving elaborated  
149 feedback would synchronize instructor-learner dyads' brain activity, potentially in  
150 frontoparietal regions. [Adults rely on the parietal cortex to process the informative and](#)  
151 [efficient feedback for performance adjustment or error correction \(Crone et al., 2008;](#)  
152 [van Duijvenvoorde et al., 2008\)](#). Elaborated feedback, regarded as informative and  
153 efficient for the concept learning, facilitates the transfer of knowledge to novel contexts  
154 (Butler et al., 2013; Finn et al., 2018). Accordingly, we further hypothesized that  
155 parietal instructor-learner neural synchronization would predict learning performance,  
156 especially transfer effects.

## 157 **Methods**

### 158 **Ethics statement**

159 This study was carried out according to the guidelines in the Declaration of Helsinki.  
160 The study procedure was approved by Human Research Protection Committee at our  
161 University. All participants gave their written informed consent prior to the experiment.  
162 Participants were financially compensated for their participation.

### 163 **Participants**

164 Twenty-four healthy, female, right-handed participants were recruited as instructors.  
165 They were required to major in psychology and complete at least one of teacher  
166 education courses. Besides, forty-eight healthy, female, right-handed participants were  
167 recruited as learners. They were required to not major in psychology. Twelve instructors

168 were randomly assigned into the elaborated feedback group (age  $M = 21.75$ ,  $SD = 2.42$ ),  
169 while the other twelve into the simple feedback group (age  $M = 21.25$ ,  $SD = 2.93$ ,  $t_{(22)}$   
170  $= 0.46$ ,  $p = 0.65$ ). Each instructor was randomly paired with up to two learners. The  
171 instructor taught each of the two learners using the same type of feedback (either  
172 elaborated or simple feedback) individually over two adjacent days, resulting in a  
173 between-subject design for both learners and instructors. We chose this design to blind  
174 instructors (all psychology majors) to the experimental purpose and achieve higher  
175 consistency in task delivery across learners. Accordingly, 48 dyads composed of one  
176 instructor and one learner were formed. The age of learners did not differ between the  
177 elaborated feedback group ( $M = 19.63$ ,  $SD = 1.95$ ) and simple feedback group ( $M =$   
178  $19.79$ ,  $SD = 1.77$ ,  $t_{(46)} = 0.31$ ,  $p = 0.76$ ). We merely recruited female dyads to control  
179 for the potential impacts of gender difference (Baker et al., 2016; Cheng et al., 2015;  
180 see also Hu et al., 2018; Pan et al., 2018; 2020 for similar settings). All participants  
181 were naïve with respect to the purpose of the study.

## 182 **Materials**

183 Materials used for instruction and learning were about a set of ten psychology concepts  
184 from the topic of judgement and decision making (Rawson et al., 2015). Each concept  
185 has a term, a one-sentence definition and two examples (view details in Table S1).  
186 Examples illustrated target concepts in concrete and real-world situations. Examples  
187 used in the current study were adapted from psychology textbooks (Hou, 2018;  
188 Pastorino & Doyle-Portillo, 2008; Zimbardo et al., 2012) and materials used by  
189 previous studies on feedback-based learning (Finn et al., 2018; Rawson et al., 2015).  
190 The specific use of materials was described together with the experimental procedures  
191 as follows.



---

192 **Experimental protocol**

193 The experiment was carried out over two visits to the laboratory, with the interval of  
194 one or two days (Figure 1a).

195 During visit 1, learners completed a pre-learning test (< 15 min) assessing their  
196 prior knowledge relative to those ten psychology concepts. Specifically, learners were  
197 required to match 10 definitions with 10 terms from provided 12 terms (c.f. Allen and  
198 Brooks, 1991; Finn et al., 2018; Murphy, 2004). The extra two terms were also from  
199 the same topic of judgement and decision making (view details in Table S1). The prior  
200 knowledge was quantified in forms of accuracy on pre-learning test (i.e., dividing the  
201 number of correctly matched concepts by the number of all concepts). As expected,  
202 learners had comparable prior knowledge in the elaborated vs. simple feedback group  
203 ( $M \pm SD$ ,  $0.58 \pm 0.19$  vs.  $0.58 \pm 0.26$ ,  $t_{(46)} = 0$ ,  $p > 0.999$ ). Besides, learners completed  
204 a battery of scales with regard to learning and motivation: (i) Achievement Goal  
205 Orientation (Button et al., 1996); (ii) Academic Self-efficacy (Pintrich & Groot, 1990);  
206 (iii) Learning Engagement (Schaufeli et al., 2002). No significant differences on scales  
207 for two feedback groups were detected ( $ts < 1.60$ ,  $ps > 0.10$ ). During visit 1, instructors  
208 underwent a standardized training on the instructional procedure and content (~ 30 min).  
209 Afterwards, instructors [brought home the print copies of the instruction materials and](#)  
210 [were required to learn and recite the concepts for their definitions and examples \(see](#)  
211 [details in Table S1\)](#) at home. Upon coming back to the laboratory for visit 2, instructors  
212 were required to correctly recall the instructional procedure, together with the  
213 definitions and examples of two randomly selected concepts by the experimenter.  
214 Instructors were not allowed to carry out formal instruction until they met those  
215 requirements.

216 Visit 2 consisted of two sessions: fNIRS hyperscanning and post-hyperscanning.

217 During the first session, instructors and learners sat face-to-face approximately 1 meter  
218 apart, wearing the fNIRS equipment. This session consisted of three phases: rest,  
219 introduction and feedback.

220 In the rest phase (300 s), both instructors and learners kept their eyes closed, motion  
221 restrained and mind relaxed. In the introduction phase, instructors introduced 10  
222 concepts one by one with the term and definition orally presented twice. The  
223 introduction order of the concepts was self-decided by instructors in advance. In this  
224 phase, learners listened to the introduction with the permission of requesting the  
225 repetition of unclear parts. This phase was self-paced and instructor-learner dyads in  
226 elaborated vs. simple feedback group spent comparable time ( $337.77 \text{ s} \pm 62.02$  vs.  
227  $330.78 \text{ s} \pm 66.86$ ,  $t_{(46)} = 0.38$ ,  $p = 0.71$ ).

228 In the feedback phase, learners re-studied the 10 concepts based on the instructor's  
229 feedback. The flow relevant to one concept, i.e., one trial, could be split into four  
230 periods: question, answer, feedback and confidence. Specifically, instructors first  
231 presented a definition and questioned learners which term corresponded to the  
232 definition. Then, learners gave an answer. Next, instructors provided elaborated or  
233 simple feedback to learners depending on which feedback group she was assigned in.  
234 Simple feedback merely involved the correct answer, which consisted of the term and  
235 the definition, while elaborated feedback involved the correct answer and an additional  
236 example. Finally, learners judged the confidence that they would correctly answer the  
237 relevant questions in the post-hyperscanning session via number keyboards (0–9, *very*  
238 *low to very high*). One trial for elaborated feedback group was exemplified as follows.

239 Instructor: The tendency, once an event has occurred, to overestimate one's ability to have  
240 foreseen the outcome. Which term did this definition correspond to?

241 Learner: Hindsight bias.

242 Instructor: The correct term is hindsight bias, whose definition is the tendency, once an event

---

243 has occurred, to overestimate one's ability to have foreseen the outcome. Here is an example.  
244 Some students will pat the thighs after the teacher announces the correct answer and say "I  
245 know this is the choice!"  
246 Learner: (press one number).

247 In this phase, the order of 10 concepts was also self-decided by instructors in advance,  
248 but should be different from that in the introduction phase. As expected, instructor-  
249 learner dyads in elaborated vs. simple feedback group spent longer time in the feedback  
250 period ( $339.54 \text{ s} \pm 48.42$  vs.  $137.13 \text{ s} \pm 28.38$ ,  $t_{(46)} = 17.67$ ,  $p < 0.001$ ). To note,  
251 instructor-learner dyads in elaborated feedback group spent  $136.04 \text{ s} \pm 22.22$  and  $203.50$   
252  $\text{s} \pm 30.06$  for the correct answer and example part, respectively. The whole process of  
253 the fNIRS hyperscanning session was also recorded via a digital video camera (Sony,  
254 HDR-XR100, Sony Corporation, Tokyo, Japan).

255 Following the feedback phase, the fNIRS hyperscanning device was immediately  
256 unequipped and participants completed a scale assessing task load (Hart, 2006), which  
257 showed no difference between the two feedback groups ( $t = 0.82$ ,  $p = 0.421$ ). Next,  
258 learners completed a post-learning test (< 15 min) measured both the retention of  
259 knowledge and the transfer of knowledge to novel contexts. On the retention measure,  
260 learners were required to match 10 definitions with 10 terms from provided 12 terms,  
261 which was identical with the pre-learning test. On the transfer measure, learners had to  
262 match 10 novel examples with 10 terms from provided 12 terms (c.f. Finn et al., 2018).  
263 To note, the selection of examples for use in elaborated feedback (i.e., Example 1 in  
264 Table S1) vs. transfer measure (i.e., Example 2 in Table S1) was previously decided by  
265 the experimenters without replacement. The elaboration example and the specific  
266 context/topic provided for the transfer measure were not similar as assessed by an  
267 additional group of raters ( $N = 20$ , 16 females, age  $M = 24.45$ ,  $SD = 2.89$ ; see  
268 Supplementary Methods for details).

---

269 **fNIRS data acquisition and preprocessing**

270 Instructors' and learners' brain activity was simultaneously recorded during the  
271 hyperscanning session of visit 2 using an ETG-7100 optical topography system (Hitachi  
272 Medical Corporation, Japan). Two optode probes were used for each participant: a 3×5  
273 probe covering frontal areas (eight transmitters and seven detectors resulting in 22  
274 measurement channels, i.e., CH1–22) and a 4×4 probe covering left temporoparietal  
275 areas (eight transmitters and eight detectors resulting in 24 measurement channels, i.e.,  
276 CH23–46), see Figure 1b for the reference and channel locations. The probes were  
277 placed over frontal and temporoparietal areas because these regions have been  
278 implicated in feedback-based learning (Crone et al., 2008; Luft, 2014; van  
279 Duijvenvoorde et al., 2008) as well as learning and instruction (Liu et al., 2019; Pan, et  
280 al., 2018; Zheng et al., 2018). Temporoparietal areas were focused on the left  
281 hemisphere rather than the right hemisphere due to the former is dominant for language  
282 functions (Ojemann et al., 1989; Vigneau et al., 2006), which is an essential component  
283 of concept learning. The correspondence between NIRS channels and measured points  
284 on the cerebral cortex was determined using the virtual registration approach (Singh et  
285 al., 2005; Tsuzuki et al., 2007; see details in Table S2).

286 The optical data were collected at the wavelengths of 695 and 830 nm, with a  
287 sampling rate of 10 Hz. The preprocessing of fNIRS data was performed using custom  
288 MATLAB (MathWorks, Natick, MA, USA) scripts and Homer2 toolbox (version 2.2,  
289 Huppert et al., 2009). The raw optical intensity data series were first converted into  
290 changes in optical density (OD). Channels with very low or high OD, which exceeded  
291 5 SDs, were marked as unusable and removed from the analysis. Next, OD time series  
292 were screened and corrected for motion artifacts using a channel-by-channel wavelet-  
293 based method. The Daubechies 5 (db5) wavelet was chosen (Molavi & Dumont, 2012)

294 and the tuning parameter was set to 0.1 (Cooper et al., 2012). A band-pass filter with  
295 cut-off frequencies of 0.01–1 Hz was applied to the OD data in order to reduce the slow  
296 drift and high frequency noise. The OD time data were then converted into  
297 oxyhemoglobin (HbO) and Deoxyhemoglobin (HbR) concentration changes based on  
298 the modifier Beer-Lambert Law (Cope & Delpy, 1988). In the current study, we mainly  
299 focused on HbO concentration change, which was considered as an indicator of the  
300 change in regional cerebral blood flow with higher signal-to-noise ratio (Hoshi, 2007)  
301 and has been more widely used in fNIRS hyperscanning research (e.g., Cheng et al.,  
302 2015; Hu et al., 2017; Jiang et al., 2015; Pan et al., 2017; Dai et al., 2018; Yang et al.,  
303 2020).

#### 304 **Data analysis**

##### 305 *Behavioral data analysis*

306 Learning performance was assessed by post-learning test and quantified in forms of  
307 accuracy (i.e., dividing the number of correctly answered items by the number of all  
308 items). Besides, learners' knowledge immediately before feedback (i.e., on the answer  
309 period of the feedback phase) was also quantified in forms of accuracy, which was  
310 comparable between simple feedback group ( $M \pm SD$ ,  $0.67 \pm 0.21$ ) and elaborated  
311 feedback group ( $0.62 \pm 0.15$ ,  $t_{(46)} = 0.82$ ,  $p = 0.41$ ).

312 First, we sought to verify whether conceptual knowledge was promoted by  
313 elaborated feedback. Because each instructor was randomly assigned to teach two  
314 learners, learners were nested within instructors. A linear mixed model (West et al.,  
315 2014) was thus fitted on learners' accuracy including fixed effects of test time (pre-  
316 learning vs. post-learning), plus random effects on learner and instructor identity.  
317 Accuracy on the answer period of the feedback phase and the duration of elaborated

318 feedback were additionally entered in the model to control for their potential effects.

319 Next, we investigated whether elaborated feedback promoted the learning relative  
320 to simple feedback. A linear mixed model was fitted on learners' accuracy on the  
321 retention measure, including a fixed effect of feedback type (elaborated vs. simple),  
322 plus random effects of learner and instructor identity. Accuracy on the pre-learning test,  
323 accuracy on the answer period of feedback phase and the duration of feedback were  
324 additionally entered in the model to control for their potential effects. Besides, a parallel  
325 model was fitted on learners' accuracy on the transfer measure.

326 Finally, an additional linear mixed model was conducted on confidence ratings  
327 including a fixed effect of feedback type (elaborated vs. simple), plus random effects  
328 of learner and instructor identity.

329 All behavioral analyses were computed using functions implemented in MATLAB  
330 (R2018a, MathWorks). Linear mixed models were constructed using *fitlme* function.  
331 Restricted maximum likelihood was used to estimate the models.  $F$  and  $p$  values were  
332 derived using *anova* function based on Satterthwaite approximation.

### 333 *fNIRS data analyses*

334 *WTC analysis.* Interpersonal neural synchronization (INS) between instructors and  
335 learners was computed by a wavelet transform coherence (WTC) algorithm, which  
336 estimates the correlation of a pair of time series as a function of frequency and time  
337 (Grinsted et al., 2004; Torrence & Compo, 1998). First, preprocessed HbO time series  
338 were extracted from homologous regions (following previous studies, e.g., Cui et al.,  
339 2012; Hu et al., 2018; Jiang et al., 2012; Liu et al., 2019; Pan et al., 2018; 2020). For  
340 instance, two signals ( $i$  and  $j$ ) could be respectively extracted from instructors' CH45  
341 and the learners' CH45 (Figure 1b). Then, WTC of signals was computed by following

342 formula:

$$343 \quad \text{WTC}(t, s) = \frac{|\langle s^{-1}W^{ij}(t, s) \rangle|^2}{|\langle s^{-1}W^i(t, s) \rangle|^2 |\langle s^{-1}W^j(t, s) \rangle|^2}$$

344 where  $t$  denotes the time,  $s$  indicates the wavelet scale,  $\langle \cdot \rangle$  represents a smoothing  
345 operation in time and scale, and  $W$  is the continuous wavelet transform. Then, a 2-D  
346 (time  $\times$  frequency) WTC matrix was generated (Figure 1b, see more details in Chang  
347 & Glover, 2010; Grinsted et al., 2004).

348 In this study, we specifically investigated INS associated with elaborated feedback  
349 (for general instruction and learning, see Liu et al., 2019; Pan et al., 2018; 2020; Zhang  
350 et al., 2018). To this end, time points corresponding to the start and the end of feedback  
351 (i.e., the feedback period, Figure 1b) were marked based on the recorded videos and  
352 was adjusted for the delay-to-peak effect by 6 s (Cui et al., 2009; Jiang et al., 2015).  
353 Accordingly, elaborated feedback could be further segmented into two parts (i.e.,  
354 correct answer and example, Figure 1b).

355 *Cluster-based permutation test.* Interpersonal interactions as opposed to resting  
356 state elicited significantly larger INS (Cui et al., 2012; Jiang et al., 2012). For each dyad  
357 and each channel combination, WTC values during the feedback period and the rest  
358 phase (leaving out first and last minutes to retain more steady data) were respectively  
359 time-averaged, and then converted into Fisher  $z$ -values. Accordingly, we sought to  
360 identify frequency-channel clusters showing significantly larger WTC during  
361 elaborated feedback vs. rest using a cluster-based permutation test. It is a non-  
362 parametric statistical test that offers a solution to the problem of multiple comparisons  
363 for multi-channel and multi-frequency data (Maris & Oostenveld, 2007). We conducted  
364 it following five steps. First, we ran frequency-by-frequency and channel-by-channel  
365 linear mixed models including a fixed effect of task (feedback vs. rest), plus random  
366 effects of learner and instructor identity. Considering the process of elaborated feedback

367 was self-paced, duration was entered in the model to control for its potential effect.  
368 Next was to identify channels (46 in total) and frequency bins (80 in total, ranging from  
369 0.01 to 1 Hz), at which the task effect was significant (feedback > rest,  $p < 0.05$ ). To  
370 note, we excluded 12 respiration-related frequency bins from 0.15 to 0.3 Hz and 7  
371 cardiac-related frequency bins above 0.7 Hz (Nozawa et al., 2016; Zheng et al., 2018),  
372 remaining 60 frequency bins (see in Supplementary material, Figure S1). Third was to  
373 form clusters composed of neighboring channels ( $\geq 2$ ) and neighboring frequency bins  
374 ( $\geq 2$ ) and compute the statistic for each cluster by summing all  $F$  values. Fourth, repeat  
375 WTC analysis and the first step using permuted data and calculate the statistics for each  
376 cluster identified in the third step for 1000 times. The permutation was conducted by  
377 randomly pairing one learner's dataset with another instructor's dataset. As the length  
378 of datasets varied across dyads, the longer dataset was trimmed to the same length as  
379 the shorter one for each random pair (Reindl et al., 2018), see details in the  
380 Supplementary Materials and Figure S2. Finally, the observed cluster statistics were  
381 compared with the results of 1000 permutations (both converted to square roots to  
382 normalize the distributions) with  $p$  value assessed by following formula (Theiler et al.,  
383 1992):  $\text{erfc}(\frac{|S_o - \mu_p|}{\sigma_p} / \sqrt{2})$ ,  $S_o$  denotes observed cluster statistic,  $\mu_p$ ,  $\sigma_p$  respectively  
384 denote the mean and standard deviation of permutation results. The clusters with  $p$  value  
385  $< 0.05$  were regarded as significant. Besides for elaborated feedback, the cluster-based  
386 permutation test was also conducted on each of two parts of elaborated feedback, i.e.,  
387 correct answer and example, and simple feedback, i.e., correct answer only, respectively.  
388 *Contrast analysis.* To further characterize brain regions more strongly  
389 synchronized by different forms of feedback information (example vs. correct answer),  
390 a contrast analysis was performed on the significant clusters identified by the cluster-  
391 based permutation test. To control for individual differences, we used clusters'  $\Delta$ WTC



392 in the following analyses, which was computed by subtracting WTC (averaged by  
393 channels and frequency bins contained in the cluster) during task from that during rest,  
394 and then converted into Fisher  $z$ -values. Before entering the contrast analysis, time  
395 series of  $\Delta$ WTC during elaborated feedback was segmented into two parts, i.e., correct  
396 answer and example, based on the recorded videos (Figure S3). Instructor-learner dyads  
397 in the elaborated feedback group spent  $136.04 \text{ s} \pm 22.22$  and  $203.50 \text{ s} \pm 30.06$  for the  
398 correct answer and example part, respectively ( $t = 15.58, p < 0.001$ ). Then the contrast  
399 between different forms of feedback information was conducted following two steps  
400 (Figure S3). First, compare  $\Delta$ WTC during correct answer and example contained in  
401 elaborated feedback. Specifically, a linear mixed model was fit on  $\Delta$ WTC associated  
402 with two parts of elaborated feedback, including a fixed effect of feedback information  
403 (example vs. correct answer), as well as random effects of learner and instructor identity.  
404 Considering the varying data length across feedback information and across dyads,  
405 duration of feedback information was entered in the model to control for its potential  
406 effect. Second, compare  $\Delta$ WTC during simple feedback (correct answer only) and the  
407 example part of elaborated feedback, using an identical linear mixed model as that in  
408 the first step. Multiple comparisons were corrected using the false discovery rate (FDR)  
409 method (Benjamini and Hochberg, 1995) to calculate *corrected*  $p$  values.

#### 410 ***Behavior-brain relation analyses***

411 Next, we tested whether instructor-learner neural synchronization associated with  
412 elaborated feedback predicted learning performance. To control for individual  
413 differences, relative accuracy was used in the following analysis, which was computed  
414 by subtracting  $z$ -score of accuracy on the pre-learning test from that on the post-learning  
415 test. A machine learning algorithm, i.e., linear support vector regression (SVR), was

416 applied to train  $\Delta$ WTC for each identified cluster for the prediction of relative accuracy.  
417 To avoid the potential information loss by the trial-averaged  $\Delta$ WTC value, we instead  
418 extracted trial-by-trial  $\Delta$ WTC values, which was then used as up to ten features for the  
419 training. We used a leave-one-out cross-validation approach via Regression Learner  
420 APP implemented in MATLAB (R2018a, MathWorks). The prediction analysis was  
421 performed by doing such a training first on all but one dyad and then testing on the left-  
422 out dyad to examining the generalization of prediction of relative accuracy based on  
423 trial-by-trial  $\Delta$ WTC. The prediction analysis was performed  $n$  times ( $n$  = total number  
424 of dyads). Prediction accuracy was quantified by the Pearson correlation coefficient ( $r$ )  
425 between the observed and predicted relative accuracy (Hou et al., 2020; Kosinski et al.,  
426 2013). The value of  $r$  ranges from -1 to 1, indicating the worst to best prediction  
427 accuracy, with the value of  $p$  indicating the significance. Considering elaborated  
428 feedback unfolded over time, when the aforementioned prediction analyses showed  
429 significant results ( $r > 0$  and  $p < 0.05$ ), we added various time shifts (instructor's brain  
430 activity was shifted forward or backward relative to the learner's by 1–14 s, step = 1 s)  
431 to the re-computation of prediction analyses, with FDR method (Benjamini and  
432 Hochberg, 1995) calculating *corrected*  $p$  values.

## 433 **Results**

### 434 **Elaborated feedback promoted the transfer of knowledge**

435 As expected, accuracy on the post-learning test ( $M \pm SD$ ,  $0.83 \pm 0.13$ ) was significantly  
436 higher than that on the pre-learning test ( $0.58 \pm 0.19$ ,  $F_{(1, 23)} = 58.50$ ,  $p < 0.001$ ,  $\beta = 0.25$ ,  
437  $SE = 0.03$ , 95% confidence interval (CI) = 0.19 to 0.32). It was indicated that elaborated  
438 feedback promoted learners' conceptual knowledge. Next, we investigated whether  
439 elaborated feedback relative to simple feedback promoted learning. On the retention

440 measure, learners' accuracy was comparable in the elaborated feedback group ( $0.96 \pm$   
441  $0.09$ ) and simple feedback group ( $0.94 \pm 0.14$ ,  $F_{(1, 21.17)} = 1.90$ ,  $p = 0.183$ ,  $\beta = 0.04$ , SE  
442  $= 0.03$ , 95% CI =  $-0.02$  to  $0.09$ ). However, on the transfer measure, a parallel model  
443 analysis revealed that learners' accuracy in the elaborated feedback group ( $0.70 \pm 0.21$ )  
444 was significantly higher than that in the simple feedback group ( $0.59 \pm 0.21$ ,  $F_{(1, 15.63)} =$   
445  $5.42$ ,  $p = 0.031$ ,  $\beta = 0.14$ , SE =  $0.06$ , 95% CI =  $0.02$  to  $0.26$ ). It was indicated that  
446 elaborated feedback relative to simple feedback promoted transfer rather than retention  
447 of knowledge. Besides, for the confidence rating, no significant effect was revealed ( $F_{(1,$   
448  $22)} = 0.49$ ,  $p > 0.100$ ).

449 **Elaborated feedback synchronized instructor-learner dyads' neural activity in the**  
450 **frontoparietal regions**

451 We investigated whether instructor-learner dyads providing and receiving elaborated  
452 feedback as opposed to resting elicited significantly larger WTC using a cluster-based  
453 permutation test. Two significant channel-frequency clusters were identified (Figure 2  
454 and Table S3). Cluster 1 was composed of 2 spatially neighboring channels, i.e., CH42,  
455 CH45, **in 8 frequency bins, ranging from 0.017 to 0.025 Hz** (cluster statistic =  $11.54$ ,  $p$   
456  $< 0.001$ ). The channels contained in Cluster 1 were approximately located at the left  
457 parietal cortex, including the postcentral gyrus (PoCG) and superior parietal gyrus  
458 (SPG). Cluster 2 was composed of 3 spatially neighboring channels, i.e., CH05, CH06,  
459 CH10, **in 7 frequency bins, ranging from 0.017 to 0.024 Hz** (cluster statistic =  $6.62$ ,  $p$   
460  $= 0.005$ ). The channels contained in Cluster 2 were approximately located at the left  
461 frontal cortex, including the superior frontal gyrus (SFG) and middle frontal gyrus  
462 (MFG). In addition, instructor-learner synchronization on Cluster 1 and Cluster 2  
463 exhibited temporal patterns, i.e., the learners' brain activity synchronized with

464 instructors' with some delay or the opposite (see details in Supplementary Results,  
465 Figure S4).

466 Additionally, granger causality analysis was performed to explore the information  
467 flow [during the period of elaborated feedback](#) from instructor to learner or from learner  
468 to instructor on brain regions corresponding to the identified clusters (see more details  
469 in Supplementary Methods). Granger causality analysis revealed significant and  
470 comparable bidirectional information flow between the instructor and the learner when  
471 providing and receiving elaborated feedback (see more details in Supplementary  
472 Results, Figure S2).

### 473 **Frontoparietal instructor-learner synchronization was specific to examples**

474 To further characterize the brain regions synchronized by different feedback  
475 information, brain activity during elaborated feedback was segmented into two parts  
476 (i.e., example and correct answer) and respectively compared with that during resting  
477 using a cluster-based permutation test. For the example part of elaborated feedback, two  
478 significant channel-frequency clusters were identified (Figure 3 and Table S4). Cluster  
479 3 was composed of 2 spatially neighboring channels, i.e., CH42, CH45, [in 8 frequency](#)  
480 [bins, ranging from 0.018 to 0.027 Hz](#) (cluster statistic = 13.69,  $p < 0.001$ ). The channels  
481 contained in Cluster 3 were approximately located at the left parietal cortex, including  
482 the PoCG and SPG. Cluster 4 was composed of 3 spatially neighboring channels, i.e.,  
483 CH05, CH06, CH10, [in 8 frequency bins, ranging from 0.015 to 0.023 Hz](#) (cluster  
484 statistic = 10.61,  $p < 0.001$ ). The channels contained in Cluster 4 were approximately  
485 located at the left frontal cortex, including the SFG and MFG. To note, Cluster 1 and  
486 Cluster 3 contained identical channels, while Cluster 2 and Cluster 4 contained identical  
487 channels. In addition, the synchronized brain activity on Cluster 3 and Cluster 4

488 exhibited temporal patterns, i.e., the learners' brain activity synchronized with  
489 instructors' with some delay or the opposite (see details in Supplementary Results,  
490 Figure S4). However, for the correct answer part of elaborated feedback, no significant  
491 channel-frequency cluster was identified (Table S4). Simple feedback (only containing  
492 the information of correct answer) was also compared with rest using a cluster-based  
493 permutation test and no significant channel-frequency cluster was identified (Table S5).  
494 It was indicated that instructor-learner neural synchronization on frontoparietal regions  
495 was specific to the example rather than correct answer part of elaborated feedback.

496       Next, contrast analysis was conducted between different forms of feedback  
497 information (example vs. correct answer) by two steps, on Cluster 3 and Cluster 4,  
498 respectively. The first was to compare  $\Delta$ WTC during the example and correct answer  
499 contained in elaborated feedback, and the second was to compare  $\Delta$ WTC during the  
500 example part of elaborated feedback and simple feedback (correct answer only) based  
501 on linear mixed models. On Cluster 3, providing and receiving the example vs. correct  
502 answer part of elaborated feedback elicited larger  $\Delta$ WTC (feedback minus rest) ( $0.10$   
503  $\pm 0.12$  vs.  $0.09 \pm 0.11$ ,  $F_{(1, 23.70)} = 8.21$ ,  $p = 0.009$ , corrected  $p = 0.018$ ,  $\beta = 0.15$ , SE =  
504  $0.05$ , 95% CI =  $0.04$  to  $0.25$ , Figure 4a), with the duration of feedback information  
505 showing a significant effect ( $F_{(1, 27.87)} = 11.486$ ,  $p = 0.002$ ,  $\beta = -0.002$ , SE =  $0.001$ , 95%  
506 CI =  $-0.003$  to  $-0.001$ ); providing and receiving the example part of elaborated feedback  
507 vs. simple feedback also elicited larger  $\Delta$ WTC ( $0.10 \pm 0.12$  vs.  $0.01 \pm 0.14$ ,  $F_{(1, 26.60)} =$   
508  $4.75$ ,  $p = 0.037$ , corrected  $p = 0.049$ ,  $\beta = 0.13$ , SE =  $0.06$ , 95% CI =  $0.01$  to  $0.24$ , Figure  
509 4a), with the duration of feedback information showing non-significant effect ( $F_{(1, 31.17)}$   
510  $= 0.56$ ,  $p = 0.461$ ,  $\beta = -0.000$ , SE =  $0.001$ , 95% CI =  $-0.002$  to  $0.001$ ). On Cluster 4,  
511 providing and receiving the example vs. the correct answer part of elaborated feedback  
512 elicited comparable  $\Delta$ WTC ( $0.12 \pm 0.13$  vs.  $0.11 \pm 0.13$ ,  $F_{(1, 19.73)} = 2.46$ ,  $p = 0.133$ ,

513 *corrected*  $p = 0.133$ ,  $\beta = 0.09$ ,  $SE = 0.06$ ,  $95\% CI = -0.03$  to  $0.22$ , Figure 4b), with the  
514 duration of feedback information showing non-significant effect ( $F_{(1, 23.88)} = 3.48$ ,  $p =$   
515  $0.074$ ,  $\beta = -0.001$ ,  $SE = 0.001$ ,  $95\% CI = -0.003$  to  $0.000$ ); providing and receiving the  
516 example part of elaborated feedback vs. simple feedback elicited larger  $\Delta WTC$  ( $0.12 \pm$   
517  $0.13$  vs.  $0.03 \pm 0.17$ ,  $F_{(1, 45)} = 9.39$ ,  $p = 0.004$ , *corrected*  $p = 0.016$ ,  $\beta = 0.20$ ,  $SE = 0.06$ ,  
518  $95\% CI = 0.07$  to  $0.32$ , Figure 4b), with the duration of feedback information showing  
519 significant effect ( $F_{(1, 45)} = 4.63$ ,  $p = 0.037$ ,  $\beta = -0.002$ ,  $SE = 0.001$ ,  $95\% CI = -0.003$  to  
520  $-0.000$ ).

## 521 Parietal instructor-learner neural synchronization predicted the transfer of 522 knowledge

523 Next, we tested whether instructor-learner neural synchronization during  
524 providing and receiving elaborated feedback could predict learning performance. A  
525 SVR was trained on  $\Delta WTC$  associated with the example part of elaborated feedback  
526 on Cluster 3 and Cluster 4 to respectively predict learners' accuracy on the post-learning  
527 test relative to the pre-learning test. It was revealed in Figure 5a that trial-by-trial  
528  $\Delta WTC$  on Cluster 3 could successfully predict out-of-sample learners' relative  
529 accuracy on the transfer measure ( $r = 0.57$ ,  $R^2 = 32.49\%$ ,  $p = 0.004$ ) but not on the  
530 retention measure ( $r = 0.25$ ,  $R^2 = 6.25\%$ ,  $p = 0.241$ ); trial-by-trial  $\Delta WTC$  on Cluster 4  
531 could not predict learning performance ( $r_s < -0.09$ ,  $R^2_s < 0.81\%$ ,  $p_s > 0.05$ ). A similar  
532 prediction pattern was seen for synchronized neural activity associated with elaborated  
533 feedback (see more details in Supplementary Results, Figure S6a).

534 Moreover, when time shifts were added to re-perform the prediction analysis based  
535 on trial-by-trial  $\Delta WTC$  associated with the example part of elaborated feedback on  
536 Cluster 3, the prediction accuracy on the transfer measure was significant when

537 instructors' brain activity preceded learners' by 1–10 s and when learners' preceded the  
538 instructors' by 1–13 s (*corrected ps* < 0.05, Figure 5b). With time shifts, the prediction  
539 accuracy on the retention measure remained insignificant (*corrected ps* > 0.05, Figure  
540 5b). With time shifts, a similar prediction pattern was seen for synchronized brain  
541 activity associated with elaborated feedback (see more details in Supplementary Results,  
542 [Figure. S6b](#)).

543

### Discussion

544 Our findings support the notion that providing learners with elaborated feedback  
545 relative to simple feedback promotes the transfer of conceptual knowledge to novel  
546 contexts. [The neurocognitive processes of elaborated feedback](#) during instructor-learner  
547 interactions were investigated from an inter-brain perspective. When elaborated  
548 feedback unfolded overtime, we found synchronized instructor-learner dyads' brain  
549 activity in frontoparietal regions, including the superior frontal gyrus (SFG), middle  
550 frontal gyrus (MFG), postcentral gyrus (PoCG) and superior parietal gyrus (SPG). Such  
551 instructor-learner synchronization was specific to complex information, i.e., example,  
552 contained in the elaborated feedback. Based on a machine learning algorithm,  
553 instructor-learner synchronization associated with example in the parietal cortex  
554 successfully predicted out-of-sample learners' ability to transfer knowledge to novel  
555 contexts. Such a prediction was retained when instructors' brain activity preceded  
556 learners' by 1–10 s and when learners' preceded instructors' by 1–13s.

557 Although elaborated feedback is theorized to increase the probability of error  
558 correction and the depth of knowledge comprehension (Jacoby et al., 2005; Morris et  
559 al., 1977; Tulving & Thompson, 1973), previous studies have demonstrated divergent  
560 evidence on its specific effects on learning. For example, compared with correct answer

561 feedback, adding example or explanation to feedback promotes the learning of  
562 conceptual knowledge (for both knowledge retention and transfer, Finn et al., 2018; for  
563 knowledge transfer only, Butler et al., 2013). However, no greater effects of elaborated  
564 feedback relative to correct answer feedback on learning have also been reported (e.g.,  
565 Andre & Thieman, 1998; Kulhavy et al., 1985; Mandernach, 2005). It may be due to  
566 that the added information is too lengthy or complex to be processed and even offsets  
567 the effects of correct answer (Kulhavy et al., 1985; Shute, 2008). The present study  
568 found that providing learners with elaborated feedback containing example relative to  
569 correct answer feedback resulted in comparable retention of knowledge. However,  
570 when learners' ability to transfer conceptual knowledge to novel contexts was tested,  
571 elaborated feedback tended to be of benefit. These findings supported the superior effect  
572 of elaborated feedback on knowledge transfer rather than knowledge retention. [To note,](#)  
573 [in the current study, learning gains were measured almost immediately after the](#)  
574 [hyperscanning session. Follow-up studies should have another post-test with a delay](#)  
575 [interval \(e.g., one week\) to explore whether the effects of elaborated feedback are](#)  
576 [retained over longer intervals.](#)

577 [Metacognitive effects of elaborated feedback are also recognized as a crucial](#)  
578 [factor in feedback research. Correct answer feedback not only facilitates the correction](#)  
579 [of erroneous responses with high confidence \(Butterfield & Metcalfe, 2001, 2006;](#)  
580 [Pashler et al., 2005\), but also calibrates metacognitive errors on low-confidence correct](#)  
581 [responses \(Butler et al., 2008; Thomas & McDaniel, 2013\). Feedback, especially](#)  
582 [elaborated feedback, may improve the calibration and item-level accuracy of](#)  
583 [metacognitive judgments. In particular, the processing of examples contained in](#)  
584 [elaborated feedback might affirm or trigger re-evaluation of the learner's deeper](#)  
585 [conceptual understanding. Moreover, elaborated feedback provided in a social context](#)



586 involves social cues and its efficacy would be expected to be moderated by social effects  
587 such as relationship between the instructor and the learner. Besides, patterns of neural  
588 synchronization might differ based on whether participant's answer in the feedback  
589 phase was correct or incorrect. Unfortunately, the limited number of items (only 10) in  
590 this study restricted item-level analyses or conditional analyses on correct vs. incorrect  
591 responses. Future research is required to explore whether feedback on correct vs.  
592 incorrect answers, high vs. low confidence correct answers, or high vs. low confidence  
593 errors differs with respect to the sequencing of learner-instructor synchronization (that  
594 is, learner-delayed or learner-preceded neural synchronization).

595 When instructor-learner dyads providing and receiving elaborated feedback, we  
596 found synchronized brain activity in frontoparietal regions. Frontoparietal regions such  
597 as the [anterior cingulate cortex \(ACC\)](#), DLPFC and parietal lobules are well-localized  
598 by single-brain imaging research on feedback-based learning (Cavanagh et al., 2011;  
599 Crone et al., 2008; Luft et al., 2013; Mars et al., 2005; van Duijvenvoorde et al., 2008;  
600 Zanolie et al., 2008). Activity generated in the ACC, tracks a basic feedback function  
601 of error detection and conflict monitoring (Cavanagh et al., 2011; Luft et al., 2013; Mars  
602 et al., 2005). Moreover, the DLPFC and parietal lobules play essential role in error  
603 correction and performance adjustment (Zanolie et al., 2008; van Duijvenvoorde et al.,  
604 2008). Besides, DLPFC is also implicated in social interaction (Kanske et al., 2015;  
605 Schurz et al., 2014). In the current study, synchronized brain activity observed  
606 approximately in the SFG, MFG, PoCG and SPL, which were spatially proximal to  
607 well-defined feedback sensitive regions, may underlie the providing and receiving  
608 elaborated feedback by instructor-learner dyads in real-world educational settings. In  
609 our study, we further demonstrated that instructor-learner synchronization in  
610 frontoparietal regions was specifically associated with complex information, i.e.,

611 example, contained in the elaborated feedback, whereas providing and receiving the  
612 correct answer failed to synchronize brain activity from instructors and learners. These  
613 results suggest that feedback information beyond the correct answer recruit separable  
614 brain activity in instructor-learner dyads, which potentially supports the superior effect  
615 of elaborated feedback on learning.

616 Furthermore, based on linear SVR, instructor-learner synchronization associated  
617 with example in the parietal cortex rather than frontal regions successfully predicted  
618 out-of-sample learners' ability to transfer knowledge to novel contexts. [In comparison  
619 with the ACC](#), parietal lobules mature late in feedback processing (Peters et al., 2016).  
620 [Adults rely more on the parietal cortex than the ACC to process informative and  
621 efficient feedback to adjust performance or correct errors](#) (Crone et al., 2008; van  
622 [Duijvenvoorde et al., 2008](#); Zanolie et al., 2008), which plays a more critical role in  
623 knowledge acquisition. Concrete examples contained in elaborated feedback tended to  
624 be informative and efficient for concept learning and had advantages in facilitating  
625 transfer (Bangert-Drowns et al., 1991; Butler et al., 2013; Finn et al., 2018; Kulhavy &  
626 Stock, 1989). [The current study observed instructor-learner neural synchronization in  
627 frontal regions but such neural synchronization had no connection to learning  
628 performance. In line with previous research, feedback information tended to activate  
629 frontal brain regions](#) (Cavanagh et al., 2011; Mars et al., 2005). However, due to the  
630 limited depth of NIR light penetration (Ferrari & Quaresima, 2012), brain activity  
631 [generated as deep as from the “feedback-related” ACC](#) (Cavanagh et al., 2011) might  
632 [not have been reliably tracked. Future studies could use fMRI hyperscanning to assess  
633 the involvement of INS in frontal regions in feedback-based learning. In this study,  
634 whether INS serves as a mechanism that supports learning or it is simply an  
635 epiphenomenon also requires further careful and detailed examination](#) (Hamilton, 2021;

636 [Wass et al., 2020; Novembre & Iannetti, 2021; Pan et al., 2021a](#)). One way to test the  
637 causal role of INS in learning is using a multi-brain stimulation protocol ([Novembre et](#)  
638 [al., 2017; Novembre & Iannetti, 2021; Pan et al., 2021b](#)).

639 Interestingly, prediction effect of instructor-learner synchronization associated  
640 with example in the parietal cortex retained when instructors' brain activity preceded  
641 learners' by 1–10 s and when learners' preceded instructors' by 1–13 s. The processing  
642 of high-level linguistic structures such as sentences and paragraphs is at timescale of  
643 seconds, whereas that of sound-level acoustic features is milliseconds ([Hasson et al.,](#)  
644 [2015](#)). In average, each example was presented with 2.4 sentences, lasting for about  
645 20.3 second. Therefore, the maximal temporal shifts are more likely to reflect sentence-  
646 level rather than word- or syllable-level processing. [Transfer tends to occur when the](#)  
647 [prior learned knowledge is represented at deeper levels, e.g., abstract structure and](#)  
648 [personal interpretation, instead of surface levels, e.g., specific words and syntax](#)  
649 [\(Graesser et al., 1997; Kintsch, 1998\)](#). To extract the abstract structure of knowledge  
650 demands a sufficient amount of information being transmitted from instructors to  
651 learners and the integration of such information over a time window ([Stephens et al.,](#)  
652 [2010; Tatler et al., 2003](#)). Accordingly, this predicts that learner-delayed neural  
653 synchronization may predict transfer effects. If knowledge was represented into  
654 personal interpretation, learners would be able to predict the upcoming information  
655 before it was completely provided ([DeVault et al., 2011; Pickering & Garrod, 2013](#)),  
656 resulting in learner-preceding neural synchronization that predicts transfer effects. In  
657 the current study, we found that instructor-learner neural synchronization with temporal  
658 shifts (both learner-delayed and learner-preceded) could successfully predict transfer,  
659 which provides preliminary supporting evidence to the notion that deeper-level  
660 representations of knowledge in parietal regions may promote transfer. Nevertheless,

661 as previous research has found that abstract knowledge structure (also called “schema”)  
662 is associated with mPFC function (Gilboa, 2017), other brain regions may also play a  
663 critical role in deep-level knowledge representations. Future research should  
664 specifically address underlying cognitive processes supporting the transfer effect of  
665 elaborated feedback by experimental manipulation. To note, the broad significant time  
666 window detected in the current study might indicate a lack of temporal sensitivity in  
667 blood flow changes to cognitive events (Huppert et al., 2006; Pinti et al., 2020).  
668 Considering the broad time window, specific conclusions regarding the directionality  
669 of effects may not be drawn.

670 In current study, several questions deserve noting. First, instructor-learner dyads  
671 in the elaborated feedback group spent extra ~200 seconds than those in the simple  
672 feedback group during task. The amount of social interaction in dyads might have  
673 influenced the synchronization of instructor-learner brain activity (Zheng et al., 2018).  
674 Though our linear mixed models controlled for the factor of duration of feedback, it  
675 would be ideal for future studies to have a third control group that received simple  
676 feedback with time on task equated with the elaborated feedback condition. Second, in  
677 accordance with previous hyperscanning studies of educational interactions (Holper et  
678 al., 2013; Liu et al., 2019; Pan et al., 2018; 2020), we mainly focused on INS between  
679 the instructors’ and learners’ homologous regions across different time lags (i.e., one’s  
680 brain activity precedes that of the other). Considering the instructors and the learners  
681 are expected to have different roles (i.e., teaching and learning), neural synchronization  
682 between different brain regions or that with time lags is expected (Jiang et al., 2021;  
683 Zheng et al., 2018; Liu et al., 2017). Due to the limited channels of fNIRS, our optode  
684 probe set only covered the frontal cortex and left temporoparietal regions, leaving the  
685 functions of other regions unexplored. Future studies are encouraged to consolidate our

686 findings by using whole-brain coverage and by further exploring the neural  
687 synchronization between different regions in instructors and learners. Third,  
688 frequencies of instructor-learner neural synchronization associated with elaborated  
689 feedback were roughly identified within 0.01 to 0.03 Hz, overlapping some of those  
690 identified by previous fNIRS hyperscanning studies using communication paradigms  
691 (e.g., Jiang et al., 2012; 2015) and education tasks (e.g., Zheng et al., 2018). Future  
692 research may wish to further characterize INS for its potential significance in the  
693 frequency domain as EEG signals in terms of ranges and functions (Henry, 2006; Teplan,  
694 2002). Fourth, considering that feedback effects could be mediated by learners' prior  
695 knowledge (Fyfe et al., 2012; Krause et al., 2009) and metacognitive judgment (Butler  
696 et al., 2008; Thomas & McDaniel, 2013), future work is expected to be more prudent  
697 when screening learners. For example, apart from not being Psychology majors,  
698 learners are also expected to not have taken a Psychology class in recent years. Their  
699 degree of confidence or certainty in the correctness of the testing items should also be  
700 assessed. Besides, only female dyads were tested in order to reduce the sample  
701 variability, in accordance with previous evidence and recommendations (Baker et al.,  
702 2016; Cheng et al., 2015; Tang et al., 2019). Future studies should consolidate and  
703 generalize the current findings to male participants. Last but not the least, the critical  
704 role of social factors, such as communication mode (e.g., human-human, human-  
705 computer) and relationship between instructors and learners (e.g., trust, rapport), in  
706 shaping learning from feedback might be a fruitful direction for future investigations.

707 In summary, the current results suggest that the feedback information beyond the  
708 correct answer could promote learning, especially for transfer of knowledge to novel  
709 contexts. Extending previous findings based on computer-controlled paradigms, this  
710 study used an ecologically valid yet experimentally controlled feedback-based concept

## ELABORATED FEEDABCK AND TRANSFER

30

---

711 learning task carried out by instructor-learner dyads with their brain activity  
712 simultaneously measured using fNIRS. As feedback information unfolded over time,  
713 instructor-learner neural synchronization was observed in frontoparietal regions,  
714 especially when examples were provided, and predicted the transfer of conceptual  
715 knowledge to novel contexts. Inter-brain dynamics may provide a novel lens for people  
716 to understand more about how elaborated feedback and learner-instructor interactions  
717 shape learning and transfer, thence unmask the neurocognitive basis of feedback  
718 provided in a social context and contributes to pedagogical efficacy.

719

720

## References

- 721 Allen, S. W., & Brooks, L. R. (1991). Specializing the operation of an explicit rule. *Journal of*  
722 *experimental psychology: General*, 120(1), 3–19.
- 723 Andre, T., & Thieman, A. (1988). Level of adjunct question, type of feedback, and learning concepts by  
724 reading. *Contemporary Educational Psychology*, 13(3), 296–307.
- 725 Arbel, Y., Goforth, K., & Donchin, E. (2013). The good, the bad, or the useful? The examination of the  
726 relationship between the feedback-related negativity (FRN) and long-term learning  
727 outcomes. *Journal of Cognitive Neuroscience*, 25(8), 1249–1260.
- 728 Baker, J. M., Liu, N., Cui, X., Vrticka, P., Saggar, M., Hosseini, S. H., & Reiss, A. L. (2016). Sex  
729 differences in neural and behavioral signatures of cooperation revealed by fNIRS  
730 hyperscanning. *Scientific reports*, 6, 26492.
- 731 Bangert-Drowns, R. L., Kulik, C. L. C., Kulik, J. A., & Morgan, M. (1991). The instructional effect of  
732 feedback in test-like events. *Review of educational research*, 61(2), 213–238.
- 733 Benjamini, Y., & Hochberg, Y. (1995). Controlling the false discovery rate: a practical and powerful  
734 approach to multiple testing. *Journal of the Royal statistical society: series B*  
735 *(Methodological)*, 57(1), 289–300.
- 736 Bevilacqua, D., Davidesco, I., Wan, L., Chaloner, K., Rowland, J., Ding, M., ... & Dikker, S. (2019).  
737 Brain-to-brain synchrony and learning outcomes vary by student–teacher dynamics: Evidence from  
738 a real-world classroom electroencephalography study. *Journal of cognitive neuroscience*, 31(3),  
739 401–411.
- 740 Bilek, E., Stöbel, G., Schäfer, A., Clement, L., Ruf, M., Robnik, L., ... & Meyer-Lindenberg, A. (2017).  
741 State-dependent cross-brain information flow in borderline personality disorder. *JAMA*  
742 *psychiatry*, 74(9), 949–957.
- 743 Boas, D. A., Elwell, C. E., Ferrari, M., & Taga, G. (2014). Twenty years of functional near-infrared  
744 spectroscopy: introduction for the special issue. *NeuroImage*, 85, 1–5.
- 745 Bransford, J. D., Brown, A. L., & Cocking, R. R. (1999). *How people learn: Brain, mind, experience,*  
746 *and school*. Washington, DC: National Academy Press.
- 747 Butler, A. C., Godbole, N., & Marsh, E. J. (2013). Explanation feedback is better than correct answer  
748 feedback for promoting transfer of learning. *Journal of Educational Psychology*, 105(2), 290–298.
- 749 Butler, A. C., Karpicke, J. D., & Roediger III, H. L. (2008). Correcting a metacognitive error: feedback

- 750 increases retention of low-confidence correct responses. *Journal of Experimental Psychology:*  
751 *Learning, Memory, and Cognition*, 34(4), 918–928.
- 752 Button, S. B., Mathieu, J. E., & Zajac, D. M. (1996). Goal orientation in organizational research: A  
753 conceptual and empirical foundation. *Organizational behavior and human decision*  
754 *processes*, 67(1), 26–48.
- 755 Cavanagh, J. F., Figueroa, C. M., Cohen, M. X., & Frank, M. J. (2012). Frontal theta reflects uncertainty  
756 and unexpectedness during exploration and exploitation. *Cerebral cortex*, 22(11), 2575–2586.
- 757 Chang, C., & Glover, G. H. (2010). Time–frequency dynamics of resting-state brain connectivity  
758 measured with fMRI. *Neuroimage*, 50(1), 81–98.
- 759 Cheng, X., Li, X., & Hu, Y. (2015). Synchronous brain activity during cooperative exchange depends on  
760 gender of partner: A fNIRS-based hyperscanning study. *Human brain mapping*, 36(6), 2039–2048.
- 761 Cohen, V. B. (1985). A reexamination of feedback in computer-based instruction: Implications for  
762 instructional design. *Educational Technology*, 25(1), 33–37.
- 763 Cooper, R., Selb, J., Gagnon, L., Phillip, D., Schytz, H. W., Iversen, H. K., ... & Boas, D. A. (2012). A  
764 systematic comparison of motion artifact correction techniques for functional near-infrared  
765 spectroscopy. *Frontiers in neuroscience*, 6, 147.
- 766 Cope, M., & Delpy, D. T. (1988). System for long-term measurement of cerebral blood and tissue  
767 oxygenation on newborn infants by near infra-red transillumination. *Medical and Biological*  
768 *Engineering and Computing*, 26(3), 289–294.
- 769 Crone, E. A., Zanolie, K., Van Leijenhorst, L., Westenberg, P. M., & Rombouts, S. A. (2008). Neural  
770 mechanisms supporting flexible performance adjustment during development. *Cognitive, Affective,*  
771 *& Behavioral Neuroscience*, 8(2), 165–177.
- 772 Cui, X., Bryant, D. M., & Reiss, A. L. (2012). NIRS-based hyperscanning reveals increased interpersonal  
773 coherence in superior frontal cortex during cooperation. *Neuroimage*, 59(3), 2430–2437.
- 774 Cui, X., Stetson, C., Montague, P. R., & Eagleman, D. M. (2009). Ready... go: amplitude of the fMRI  
775 signal encodes expectation of cue arrival time. *PLoS Biol*, 7(8), e1000167.
- 776 Dai, B., Chen, C., Long, Y., Zheng, L., Zhao, H., Bai, X., ... & Ding, G. (2018). Neural mechanisms for  
777 selectively tuning in to the target speaker in a naturalistic noisy situation. *Nature*  
778 *communications*, 9(1), 1–12.
- 779 DeVault, D., Sagae, K., & Traum, D. (2011). Incremental interpretation and prediction of utterance



- 
- 780 meaning for interactive dialogue. *Dialogue & Discourse*, 2(1), 143–170.
- 781 Dikker, S., Wan, L., Davidesco, I., Kaggen, L., Oostrik, M., McClintock, J., ... & Poeppel, D. (2017).
- 782 Brain-to-brain synchrony tracks real-world dynamic group interactions in the classroom. *Current*
- 783 *Biology*, 27(9), 1375–1380.
- 784 Dion, J. S., & Restrepo, G. (2016). A systematic review of the literature linking neural correlates of
- 785 feedback processing to learning. *Zeitschrift für Psychologie*, 224(4), 247–256.
- 786 Faraggi, D., & Reiser, B. (2002). Estimation of the area under the ROC curve. *Statistics in*
- 787 *medicine*, 21(20), 3093–3106.
- 788 Finn, B., Thomas, R., & Rawson, K. A. (2018). Learning more from feedback: Elaborating feedback
- 789 with examples enhances concept learning. *Learning and Instruction*, 54, 104–113.
- 790 [Fyfe, E. R., Rittle-Johnson, B., & DeCaro, M. S. \(2012\). The effects of feedback during exploratory](#)
- 791 [mathematics problem solving: Prior knowledge matters. \*Journal of Educational Psychology\*,](#)
- 792 [104, 1094–1108.](#)
- 793 Gagne, R. M. (1970). *The conditions of learning* (2nd ed.). New York: Holt, Rinehart & Winston.
- 794 [Gilboa, A., & Marlatte, H. \(2017\). Neurobiology of schemas and schema-mediated memory. \*Trends\*](#)
- 795 [in cognitive sciences](#), 21(8), 618–631.
- 796 Graesser, A. C., Millis, K. K., & Zwaan, R. A. (1997). Discourse comprehension. *Annual Review of*
- 797 *Psychology*, 48, 163–189.
- 798 Grinsted, A., Moore, J. C., & Jevrejeva, S. (2004). Application of the cross wavelet transform and wavelet
- 799 coherence to geophysical time series. *Nonlinear Processes in Geophysics*, 11, 561–566.
- 800 [Hamilton, A. F. D. C. \(2021\). Hyperscanning: beyond the hype. \*Neuron\*, 109\(3\), 404–407.](#)
- 801 [Hart, S. G. \(2006\). NASA-task load index \(NASA-TLX\); 20 years later. In \*Proceedings of the human\*](#)
- 802 [factors and ergonomics society annual meeting](#) (Vol. 50, No. 9, pp. 904-908). Sage CA: Los Angeles,
- 803 [CA: Sage publications.](#)
- 804 Hasson, U., Chen, J., & Honey, C. J. (2015). Hierarchical process memory: memory as an integral
- 805 component of information processing. *Trends in cognitive sciences*, 19(6), 304–313.
- 806 Hasson, U., Ghazanfar, A. A., Galantucci, B., Garrod, S., & Keysers, C. (2012). Brain-to-brain coupling:
- 807 a mechanism for creating and sharing a social world. *Trends in cognitive sciences*, 16(2), 114–121.
- 808 Hattie, J., & Timperley, H. (2007). The power of feedback. *Review of educational research*, 77(1), 81–
- 809 112.

- 810 Henry, J. C. (2006). Electroencephalography: Basic principles, clinical applications, and related  
811 fields. *Neurology*, *67*(11), 2092–2092.
- 812 Holper, L., Goldin, A. P., Shalóm, D. E., Battro, A. M., Wolf, M., & Sigman, M. (2013). The teaching  
813 and the learning brain: A cortical hemodynamic marker of teacher–student interactions in the  
814 Socratic dialog. *International Journal of Educational Research*, *59*, 1–10.
- 815 Hoshi, Y. (2007). Functional near-infrared spectroscopy: current status and future prospects. *Journal of*  
816 *biomedical optics*, *12*(6), 062106.
- 817 Hou, Y. (2018). *Social Psychology*. Peking University Press: Beijing.
- 818 Hou, Y., Song, B., Hu, Y., Pan, Y., & Hu, Y. (2020). The averaged inter-brain coherence between the  
819 audience and a violinist predicts the popularity of violin performance. *NeuroImage*, *211*, 116655.
- 820 Hu, Y., Hu, Y., Li, X., Pan, Y., & Cheng, X. (2017). Brain-to-brain synchronization across two persons  
821 predicts mutual prosociality. *Social Cognitive and Affective Neuroscience*, *12*(12), 1835–1844.
- 822 Huppert, T. J., Diamond, S. G., Franceschini, M. A., & Boas, D. A. (2009). HomER: a review of time-  
823 series analysis methods for near-infrared spectroscopy of the brain. *Applied optics*, *48*(10), D280–  
824 D298.
- 825 [Huppert, T. J., Hoge, R. D., Diamond, S. G., Franceschini, M. A., & Boas, D. A. \(2006\). A temporal  
826 comparison of BOLD, ASL, and NIRS hemodynamic responses to motor stimuli in adult  
827 humans. \*Neuroimage\*, \*29\*\(2\), 368–382.](#)
- 828 Jacoby, L. L., Shimizu, Y., Daniels, K. A., & Rhodes, M. G. (2005). Modes of cognitive control in  
829 recognition and source memory: Depth of retrieval. *Psychonomic bulletin & review*, *12*(5), 852–  
830 857.
- 831 Jiang, J., Dai, B., Peng, D., Zhu, C., Liu, L., & Lu, C. (2012). Neural synchronization during face-to-face  
832 communication. *Journal of Neuroscience*, *32*(45), 16064–16069.
- 833 Jiang, J., Chen, C., Dai, B., Shi, G., Ding, G., Liu, L., & Lu, C. (2015). Leader emergence through  
834 interpersonal neural synchronization. *Proceedings of the National Academy of Sciences*, *112*(14),  
835 4274–4279.
- 836 [Jiang, J., Zheng, L., & Lu, C. \(2021\). A hierarchical model for interpersonal verbal  
837 communication. \*Social Cognitive and Affective Neuroscience\*, \*16\*\(1–2\), 246–255.](#)
- 838 Kanske, P., Böckler, A., Trautwein, F. M., & Singer, T. (2015). Dissecting the social brain: Introducing  
839 the EmpaToM to reveal distinct neural networks and brain–behavior relations for empathy and

- 
- 840 Theory of Mind. *Neuroimage*, 122, 6–19.
- 841 Kerns, J. G., Cohen, J. D., MacDonald, A. W., Cho, R. Y., Stenger, V. A., & Carter, C. S. (2004). Anterior  
842 cingulate conflict monitoring and adjustments in control. *Science*, 303(5660), 1023–1026.
- 843 Kintsch, W. (1998). *Comprehension: A paradigm for cognition*. Cambridge, UK: Cambridge University  
844 Press.
- 845 [Krause, U. M., Stark, R., & Mandl, H. \(2009\). The effects of cooperative learning and feedback on  
846 e-learning in statistics. \*Learning and instruction\*, 19\(2\), 158–170.](#)
- 847 Kulhavy, R. W., & Stock, W. A. (1989). Feedback in written instruction: The place of response  
848 certitude. *Educational psychology review*, 1(4), 279–308.
- 849 Kulhavy, R. W., White, M. T., Topp, B. W., Chan, A. L., & Adams, J. (1985). Feedback complexity and  
850 corrective efficiency. *Contemporary educational psychology*, 10(3), 285–291.
- 851 Kulhavy, R. W. (1977). Feedback in written instruction. *Review of educational research*, 47(2), 211–232.
- 852 Kingsbury, L., & Hong, W. (2020). A Multi-Brain Framework for Social Interaction. *Trends in  
853 Neurosciences*.
- 854 Kosinski, M., Stillwell, D., & Graepel, T. (2013). Private traits and attributes are predictable from digital  
855 records of human behavior. *Proceedings of the national academy of sciences*, 110(15), 5802–5805.
- 856 Leong, V., Byrne, E., Clackson, K., Harte, N., Lam, S., & Wass, S. (2017). Speaker gaze changes  
857 information coupling between infant and adult brains. *Proceedings of the National Academy of  
858 Sciences of the USA*, 114(50), 13290–13295.
- 859 Leong, V., & Schilbach, L. (2019). The promise of two-person neuroscience for developmental  
860 psychiatry: Using interaction-based sociometrics to identify disorders of social interaction. *British  
861 Journal of Psychiatry*, 215(5), 636–638.
- 862 Lepper, M. R., & Chabay, R. W. (1985). Intrinsic motivation and instruction: Conflicting views on the  
863 role of motivational processes in computer-based education. *Educational Psychologist*, 20(4), 217–  
864 230.
- 865 [Liu, Y., Piazza, E. A., Simony, E., Shewokis, P. A., Onaral, B., Hasson, U., & Ayaz, H. \(2017\).  
866 Measuring speaker–listener neural coupling with functional near infrared spectroscopy. \*Scientific  
867 reports\*, 7\(1\), 1–13.](#)
- 868 Liu, J., Zhang, R., Geng, B., Zhang, T., Yuan, D., Otani, S., & Li, X. (2019). Interplay between prior  
869 knowledge and communication mode on teaching effectiveness: interpersonal neural

- 
- 870       synchronization as a neural marker. *Neuroimage*, *193*, 93–102.
- 871   Luft, C. D. B. (2014). Learning from feedback: the neural mechanisms of feedback processing facilitating  
872       better performance. *Behavioural brain research*, *261*, 356–368.
- 873   Luft, C. D. B., Nolte, G., & Bhattacharya, J. (2013). High-learners present larger mid-frontal theta power  
874       and connectivity in response to incorrect performance feedback. *Journal of Neuroscience*, *33*(5),  
875       2029–2038.
- 876   Mandernach, B. J. (2005). Relative effectiveness of computer-based and human feedback for enhancing  
877       student learning. *The Journal of Educators Online*, *2*(1), 1–17.
- 878   Mars, R. B., Coles, M. G., Grol, M. J., Holroyd, C. B., Nieuwenhuis, S., Hulstijn, W., & Toni, I. (2005).  
879       Neural dynamics of error processing in medial frontal cortex. *Neuroimage*, *28*(4), 1007–1013.
- 880   Maris, E., & Oostenveld, R. (2007). Nonparametric statistical testing of EEG-and MEG-data. *Journal of*  
881       *neuroscience methods*, *164*(1), 177–190.
- 882   McCormick, E. M., & Telzer, E. H. (2018). Not doomed to repeat: Enhanced medial prefrontal cortex  
883       tracking of errors promotes adaptive behavior during adolescence. *Journal of cognitive*  
884       *neuroscience*, *30*(3), 281–289.
- 885   Melcher, D. (2006). Accumulation and persistence of memory for natural scenes. *Journal of vision*, *6*(1),  
886       2.
- 887   Meshulam, M., Hasenfratz, L., Hillman, H., Liu, Y. F., Nguyen, M., Norman, K. A., & Hasson, U. (2021).  
888       Neural alignment predicts learning outcomes in students taking an introduction to computer science  
889       course. *Nature communications*, *12*(1), 1–14.
- 890   Michel, M., & Morales, J. (2020). Minority reports: Consciousness and the prefrontal cortex. *Mind &*  
891       *Language*, *35*(4), 493–513.
- 892   Molavi, B., & Dumont, G. A. (2012). Wavelet-based motion artifact removal for functional near-infrared  
893       spectroscopy. *Physiological measurement*, *33*(2), 259–270.
- 894   Morris, C. D., Bransford, J. D., & Franks, J. J. (1977). Levels of processing versus transfer appropriate  
895       processing. *Journal of verbal learning and verbal behavior*, *16*(5), 519–533.
- 896   Mory, E. H. (2004). Feedback research revisited. *Handbook of research on educational communications*  
897       *and technology*, *2*, 745–783.
- 898   Murphy, G. (2004). *The big book of concepts*. MIT press.
- 899   Nguyen, M., Chang, A., Micciche, E., Meshulam, M., Nastase, S. A., & Hasson, U. (2020). Teacher-

- 
- 900 [student neural coupling during teaching and learning. \*bioRxiv\*.](#)
- 901 [Novembre, G., & Iannetti, G. D. \(2021\). Hyperscanning Alone Cannot Prove Causality. \*Multibrain\*](#)
- 902 [Stimulation Can. \*Trends in Cognitive Sciences\*. 25\(2\), 96–99.](#)
- 903 Nozawa, T., Sasaki, Y., Sakaki, K., Yokoyama, R., & Kawashima, R. (2016). Interpersonal frontopolar
- 904 neural synchronization in group communication: an exploration toward fNIRS hyperscanning of
- 905 natural interactions. *Neuroimage*, 133, 484–497.
- 906 Ojemann, G., Ojemann, J., Lettich, E., & Berger, M. (2008). Cortical language localization in left,
- 907 dominant hemisphere: An electrical stimulation mapping investigation in 117 patients. *Journal of*
- 908 *neurosurgery*, 108(2), 411–421.
- 909 Pan, Y., Cheng, X., Zhang, Z., Li, X., & Hu, Y. (2017). Cooperation in lovers: An fNIRS-based
- 910 hyperscanning study. *Human brain mapping*, 38(2), 831–841.
- 911 Pan, Y., Dikker, S., Goldstein, P., Zhu, Y., Yang, C., & Hu, Y. (2020). Instructor-learner brain coupling
- 912 discriminates between instructional approaches and predicts learning. *NeuroImage*, 116657.
- 913 [Pan, Y., Novembre, G., & Olsson, A. \(2021a\). The interpersonal neuroscience of social learning. \*PsyArxiv\*.](#)
- 914 Pan, Y., Novembre, G., Song, B., Li, X., & Hu, Y. (2018). Interpersonal synchronization of inferior frontal
- 915 cortices tracks social interactive learning of a song. *Neuroimage*, 183, 280–290.
- 916 [Pan, Y., Novembre, G., Song, B., Zhu, Y., & Hu, Y. \(2021b\). Dual brain stimulation enhances](#)
- 917 [interpersonal learning through spontaneous movement synchrony. \*Social Cognitive and Affective\*](#)
- 918 [Neuroscience](#), 16(1–2), 210–221.
- 919 Pashler, H., Cepeda, N. J., Wixted, J. T., & Rohrer, D. (2005). When does feedback facilitate learning of
- 920 words?. *Journal of Experimental Psychology: Learning, Memory, and Cognition*, 31(1), 3–8.
- 921 Pastorino, E. E., & Doyle-Portillo, S. M. (2008). What Is Psychology? Essentials. Wadsworth.
- 922 [Piazza, E. A., Hasenfratz, L., Hasson, U., & Lew-Williams, C. \(2020\). Infant and Adult Brains Are](#)
- 923 [Coupled to the Dynamics of Natural Communication. \*Psychological Science\*, 31\(1\), 6–17.](#)
- 924 [Piazza, E. A., Cohen, A., Trach, J., & Lew-Williams, C. \(2021\). Neural synchrony predicts children's](#)
- 925 [learning of novel words. \*Cognition\*, 214, 104752.](#)
- 926 Pickering, M. J., & Garrod, S. (2013). An integrated theory of language production and
- 927 comprehension. *Behavioral and brain sciences*, 36(04), 329–347.
- 928 [Pinti, P., Tachtsidis, I., Hamilton, A., Hirsch, J., Aichelburg, C., Gilbert, S., & Burgess, P. W. \(2020\).](#)
- 929 [The present and future use of functional near-infrared spectroscopy \(fNIRS\) for cognitive](#)

- 
- 930 neuroscience. *Annals of the New York Academy of Sciences*, 1464(1), 5.
- 931 Rawson, K. A., Thomas, R. C., & Jacoby, L. L. (2015). The power of examples: illustrative examples  
932 enhance conceptual learning of declarative concepts. *Educational Psychology Review*, 27(3), 483–  
933 504.
- 934 Redcay, E., & Schilbach, L. (2019). Using second-person neuroscience to elucidate the mechanisms of  
935 social interaction. *Nature Reviews Neuroscience*, 20(8), 495–505.
- 936 Reindl, V., Gerloff, C., Scharke, W., & Konrad, K. (2018). Brain-to-brain synchrony in parent-child dyads  
937 and the relationship with emotion regulation revealed by fNIRS-based  
938 hyperscanning. *NeuroImage*, 178, 493–502.
- 939 Peters, S., Braams, B. R., Raijmakers, M. E., Koolschijn, P. C. M., & Crone, E. A. (2014). The neural  
940 coding of feedback learning across child and adolescent development. *Journal of Cognitive  
941 Neuroscience*, 26(8), 1705–1720.
- 942 Peters, S., Van Duijvenvoorde, A. C., Koolschijn, P. C. M., & Crone, E. A. (2016). Longitudinal  
943 development of frontoparietal activity during feedback learning: Contributions of age, performance,  
944 working memory and cortical thickness. *Developmental Cognitive Neuroscience*, 19, 211–222.
- 945 Peters, S., Van der Meulen, M., Zanolie, K., & Crone, E. A. (2017). Predicting reading and mathematics  
946 from neural activity for feedback learning. *Developmental psychology*, 53(1), 149–159.
- 947 Phe, G. D., & Sanders, C. E. (1994). Advice and feedback: Elements of practice for problem  
948 solving. *Contemporary Educational Psychology*, 19(3), 286–301.
- 949 Pinti, P., Tachtsidis, I., Hamilton, A., Hirsch, J., Aichelburg, C., Gilbert, S., & Burgess, P. W. (2018). The  
950 present and future use of functional near - infrared spectroscopy (fNIRS) for cognitive  
951 neuroscience. *Annals of the New York Academy of Sciences*, 1–25.
- 952 Pintrich, P. R., & De Groot, E. V. (1990). Motivational and self-regulated learning components of  
953 classroom academic performance. *Journal of educational psychology*, 82(1), 33–40.
- 954 Rushworth, M. F., Buckley, M. J., Behrens, T. E., Walton, M. E., & Bannerman, D. M. (2007). Functional  
955 organization of the medial frontal cortex. *Current opinion in neurobiology*, 17(2), 220–227.
- 956 Santamaria, L., Noreika, V., Georgieva, S., Clackson, K., Wass, S., & Leong, V. (2020). Emotional  
957 valence modulates the topology of the parent-infant inter-brain network. *NeuroImage*, 207, 116341.
- 958 Schaufeli, W. B., Martinez, I. M., Pinto, A. M., Salanova, M., & Bakker, A. B. (2002). Burnout and  
959 engagement in university students: A cross-national study. *Journal of cross-cultural*

- 
- 960 *psychology*, 33(5), 464–481.
- 961 Schilbach, L., Timmermans, B., Reddy, V., Costall, A., Bente, G., Schlicht, T., & Voegeley, K. (2013).  
962 Toward a second-person neuroscience. *Behavioral and brain sciences*, 36(4), 393–414.
- 963 Schurz, M., Radua, J., Aichhorn, M., Richlan, F., & Perner, J. (2014). Fractionating theory of mind: a  
964 meta-analysis of functional brain imaging studies. *Neuroscience & Biobehavioral Reviews*, 42, 9–  
965 34.
- 966 Shute, V. J. (2008). Focus on formative feedback. *Review of educational research*, 78(1), 153–189.
- 967 Singh, A. K., Okamoto, M., Dan, H., Jurcak, V., & Dan, I. (2005). Spatial registration of multichannel  
968 multi-subject fNIRS data to MNI space without MRI. *Neuroimage*, 27(4), 842–851.
- 969 Stephens, G. J., Silbert, L. J., & Hasson, U. (2010). Speaker–listener neural coupling underlies successful  
970 communication. *Proceedings of the National Academy of Sciences*, 107(32), 14425–14430.
- 971 Tang, H., Zhang, S., Jin, T., Wu, H., Su, S., & Liu, C. (2019). Brain activation and adaptation of deception  
972 processing during dyadic face-to-face interaction. *Cortex*, 120, 326–339.
- 973 Tatler, B. W., Gilchrist, I. D., & Rusted, J. (2003). The time course of abstract visual  
974 representation. *Perception*, 32(5), 579–592.
- 975 Teplan, M. (2002). Fundamentals of EEG measurement. *Measurement science review*, 2(2), 1–11.
- 976 Theiler, J., Galdrikian, B., Longtin, A., Eubank, S., & Farmer, J. D. (1991). *Testing for nonlinearity in*  
977 *time series: the method of surrogate data* (No. LA-UR-91-3343; CONF-9108181-1). Los Alamos  
978 National Lab., NM (United States).
- 979 [Thomas, R. C., & McDaniel, M. A. \(2013\). Testing and feedback effects on front-end control over](#)  
980 [later retrieval. \*Journal of Experimental Psychology: Learning, Memory, and Cognition\*, 39\(2\),](#)  
981 [437–450.](#)
- 982 Torrence, C., & Compo, G. P. (1998). A practical guide to wavelet analysis. *Bulletin of the American*  
983 *Meteorological society*, 79(1), 61–78.
- 984 Tulving, E., & Thomson, D. M. (1973). Encoding specificity and retrieval processes in episodic  
985 memory. *Psychological review*, 80(5), 352–373.
- 986 Tsuzuki, D., Jurcak, V., Singh, A. K., Okamoto, M., Watanabe, E., & Dan, I. (2007). Virtual spatial  
987 registration of stand-alone fNIRS data to MNI space. *Neuroimage*, 34(4), 1506–1518.
- 988 van der Helden, J., Boksem, M. A., & Blom, J. H. (2010). The importance of failure: feedback-related  
989 negativity predicts motor learning efficiency. *Cerebral Cortex*, 20(7), 1596–1603.

- 
- 990 Van Duijvenvoorde, A. C., Zanolie, K., Rombouts, S. A., Raijmakers, M. E., & Crone, E. A. (2008).  
991 Evaluating the negative or valuing the positive? Neural mechanisms supporting feedback-based  
992 learning across development. *Journal of Neuroscience*, *28*(38), 9495–9503.
- 993 Vigneau, M., Beaucousin, V., Herve, P. Y., Duffau, H., Crivello, F., Houde, O., ... & Tzourio-Mazoyer,  
994 N. (2006). Meta-analyzing left hemisphere language areas: phonology, semantics, and sentence  
995 processing. *Neuroimage*, *30*(4), 1414–1432.
- 996 Wass, S.V., Whitehorn, M., Marriot Haresign, I., Phillips, E., & Leong, V. (2020). Interpersonal neural  
997 synchrony and responsivity during early learning interactions. *Trends in Cognitive Sciences*, *24*(4),  
998 329–342.
- 999 Wheatley, T., Boncz, A., Toni, I., & Stolk, A. (2019). Beyond the Isolated Brain: The Promise and  
1000 Challenge of Interacting Minds. *Neuron*, *103*(2), 186–188.
- 1001 Yang, J., Zhang, H., Ni, J., De Dreu, C. K., & Ma, Y. (2020). Within-group synchronization in the  
1002 prefrontal cortex associates with intergroup conflict. *Nature Neuroscience*, *23*(6), 754–760.
- 1003 Zanolie, K., Van Leijenhorst, L., Rombouts, S. A. R. B., & Crone, E. A. (2008). Separable neural  
1004 mechanisms contribute to feedback processing in a rule-learning task. *Neuropsychologia*, *46*(1),  
1005 117–126.
- 1006 Zimbardo, P. G., Johnson, R. L. & McCann, V. (2012). *Psychology: Core Concepts (Seventh Edition)*.  
1007 Upper Saddle River, NJ: Pearson.
- 1008 Zheng, L., Chen, C., Liu, W., Long, Y., Zhao, H., Bai, X., ... & Chen, B. (2018). Enhancement of teaching  
1009 outcome through neural prediction of the students' knowledge state. *Human brain mapping*, *39*(7),  
1010 3046–3057.
- 1011



1012 **Figure 1**

1013 *Experimental protocol, channel locations and WTC analysis*

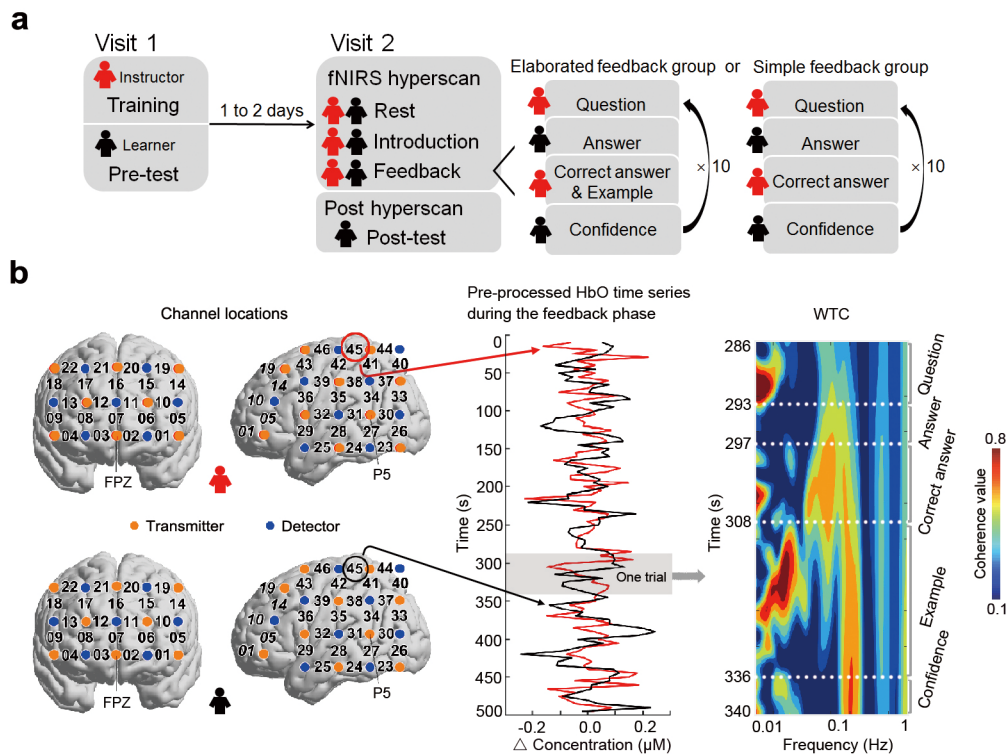

1014

1015 *Note.* (a) Schematic of the experimental protocol. During the first visit, instructors underwent  
 1016 a standardized training on the instructional procedure and content and learners completed a pre-  
 1017 learning test. During the second visit, instructor-learner dyads first rested. Then instructors  
 1018 introduced 10 concepts, during which the term and definition were orally presented twice. Next,  
 1019 learners re-studied 10 concepts one by one based on instructors' feedback (simple feedback of  
 1020 correct answer only or elaborated feedback of correct answer and example). Their brain activity  
 1021 was simultaneously recorded via fNIRS. Post hyperscanning, learners completed a post-  
 1022 learning test assessing both knowledge retention and knowledge transfer. (b) Locations of  
 1023 measurement channels and illustration of WTC analysis. On the left panel, two optode probes  
 1024 were placed over instructors' and learners' frontal and left temporoparietal areas, respectively.  
 1025 Measurement channels were located between one transmitter (orange) and one adjacent detector  
 1026 (blue). Location references were placed at FPZ and P5 according to 10-10 international system.  
 1027 On the middle panel, sample data were one instructor-learner dyad's preprocessed HbO time

## ELABORATED FEEDABCK AND TRANSFER

42

---

1028 series from CH45 during the feedback phase. On the right panel, the resulting WTC matrix  
1029 (frequency  $\times$  time) corresponding to one trial was visualized with color bar denoting the values.  
1030 HbO, oxy-hemoglobin; WTC, wavelet transform coherence.

1031

1032 **Figure 2**

1033 *Instructor-learner neural synchronization during elaborated feedback*

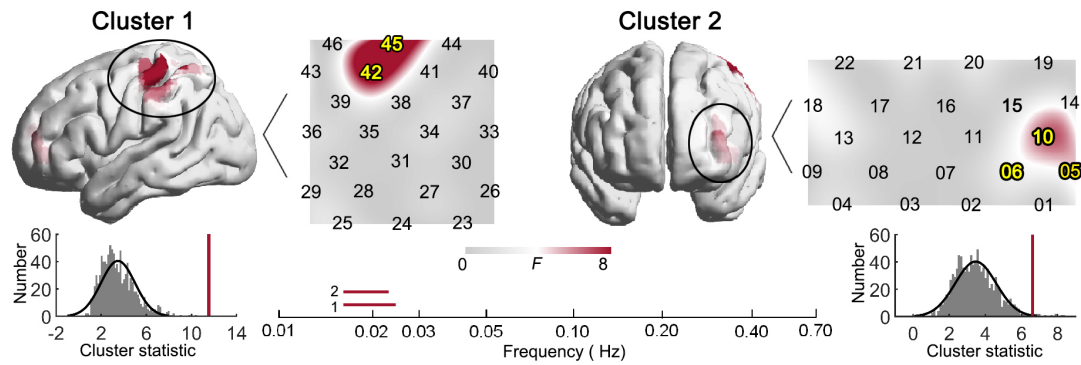

1034

1035 *Note.* Two significant clusters were identified. Cluster 1 was approximately located at the left  
1036 PoCG and left SPG within 0.017–0.025 Hz and Cluster 2 was approximately located at the left  
1037 SFG and left MFG within 0.017–0.024 Hz (with permutation tests,  $ps < 0.001$ ). Spatial locations  
1038 of the clusters are visualized at a representative frequency bin of 0.02 Hz. Yellow numbers  
1039 denote channels contained in the clusters. Red horizontal lines denote the frequency bands.  
1040 Gray histograms depict the frequent distribution of null cluster statistics, while red vertical lines  
1041 denote observed cluster statistics.

1042

1043 **Figure 3**

1044 *Instructor-learner neural synchronization during the example part of elaborated feedback*

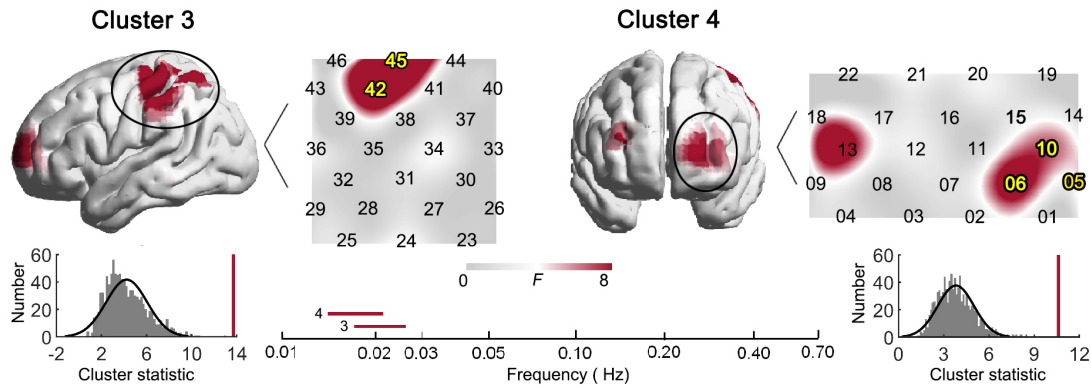

1045

1046 *Note.* Two significant clusters were identified. Cluster 3 was approximately located at the left  
1047 PoCG and left SPG within 0.018–0.027 Hz and Cluster 2 was approximately located at the left  
1048 SFG and MFG within 0.015–0.023 Hz (with permutation tests,  $ps < 0.001$ ). Spatial locations of  
1049 the clusters are visualized at a representative frequency bin of 0.02 Hz. Yellow numbers denote  
1050 channels contained in clusters. Red horizontal lines denote frequency bands. Gray histograms  
1051 depict the frequent distribution of null cluster statistics, while red vertical lines denote observed  
1052 cluster statistics.

1053

1054 **Figure 4**

1055 *Instructor-learner neural synchronization during example vs. correct answer.*

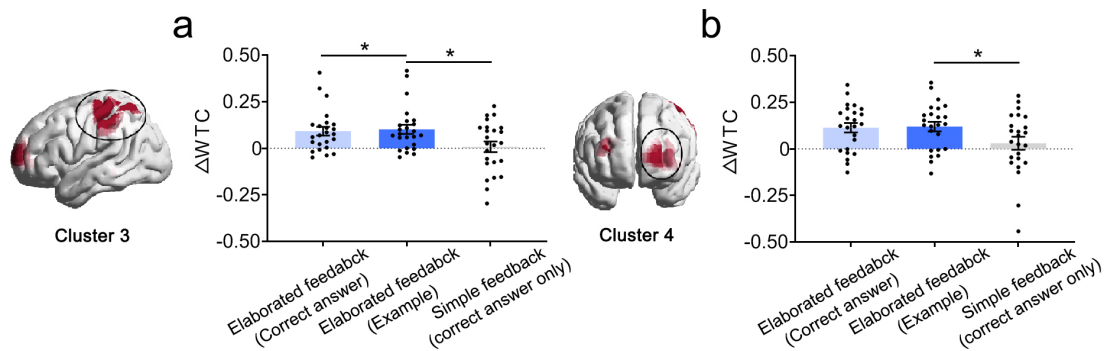

1056

1057 *Note.* (a) On Cluster 3, example relative to correct answer part of elaborated feedback and

1058 simple feedback elicited significantly larger  $\Delta WTC$ . (b) On Cluster 4, example relative to

1059 correct answer part of elaborated feedback elicited comparable  $\Delta WTC$ , while example part of

1060 elaborated feedback relative to simple feedback elicited larger  $\Delta WTC$ . \*  $p < 0.05$ .

1061

1062 **Figure 5**

1063 *Instructor-learner neural synchronization during the example part of elaborated feedback*

1064 *predicts transfer*

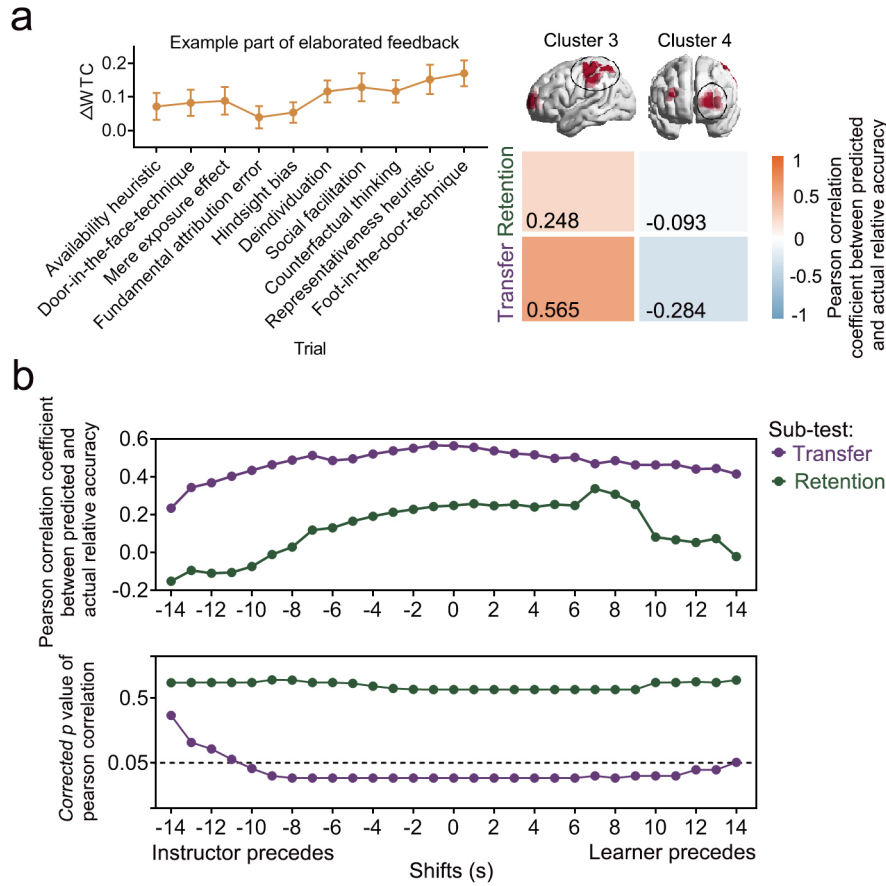

1065

1066 *Note. (a)* Trial-by-trial  $\Delta$ WTC on Cluster 3 could successfully predict out-of-sample learners'

1067 relative accuracy on the transfer measure but not on the retention measure. Warmer colors

1068 indicate relatively higher prediction accuracy for a given cluster; cooler colors indicate

1069 relatively lower prediction accuracy for a given cluster. **(b)**. The prediction accuracy for Cluster

1070 3 on the transfer measure was significant when instructors' brain activity preceded learners'

1071 1–10 s and when learners' brain activity preceded instructors' by 1–13 s (-10–13, purple).
